# Supplementary material for: A drug repurposing strategy for overcoming human multiple myeloma resistance to standard-of-care treatment
Source: PubMed Central journal article supplement (PMC8897388; doi:10.1038/s41419-022-04651-w), 2022-03-04

# Original data of western blot for Figure 1 A

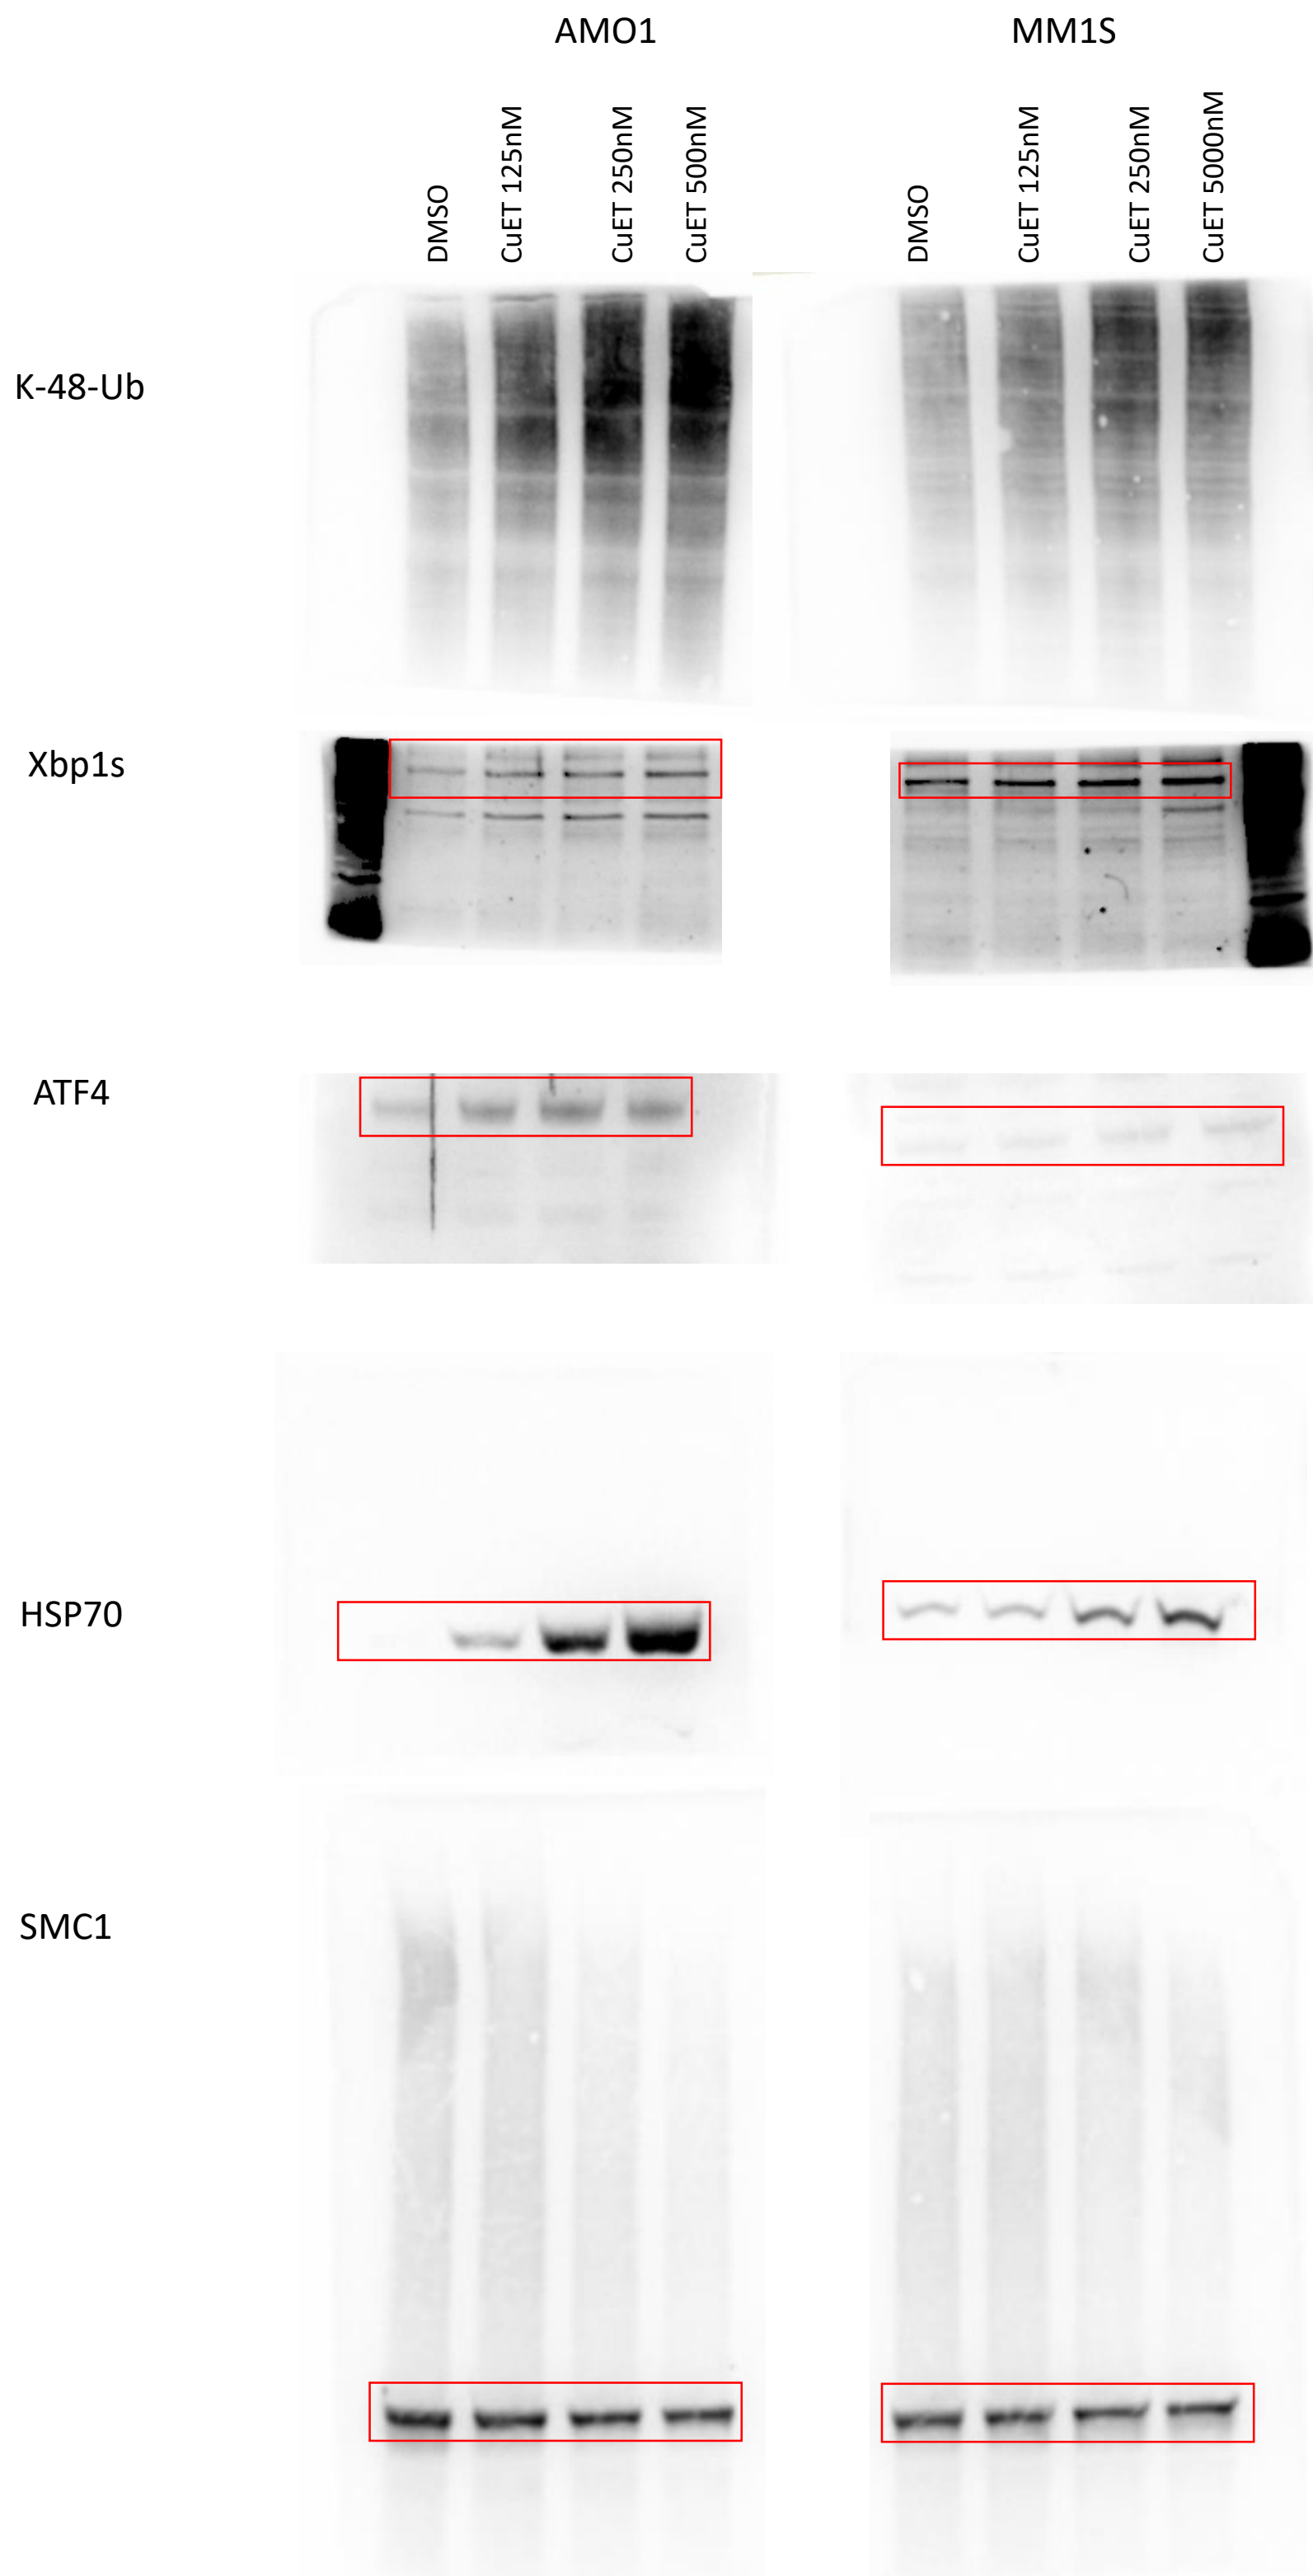

**Original data of western blot for Figure 1 B**

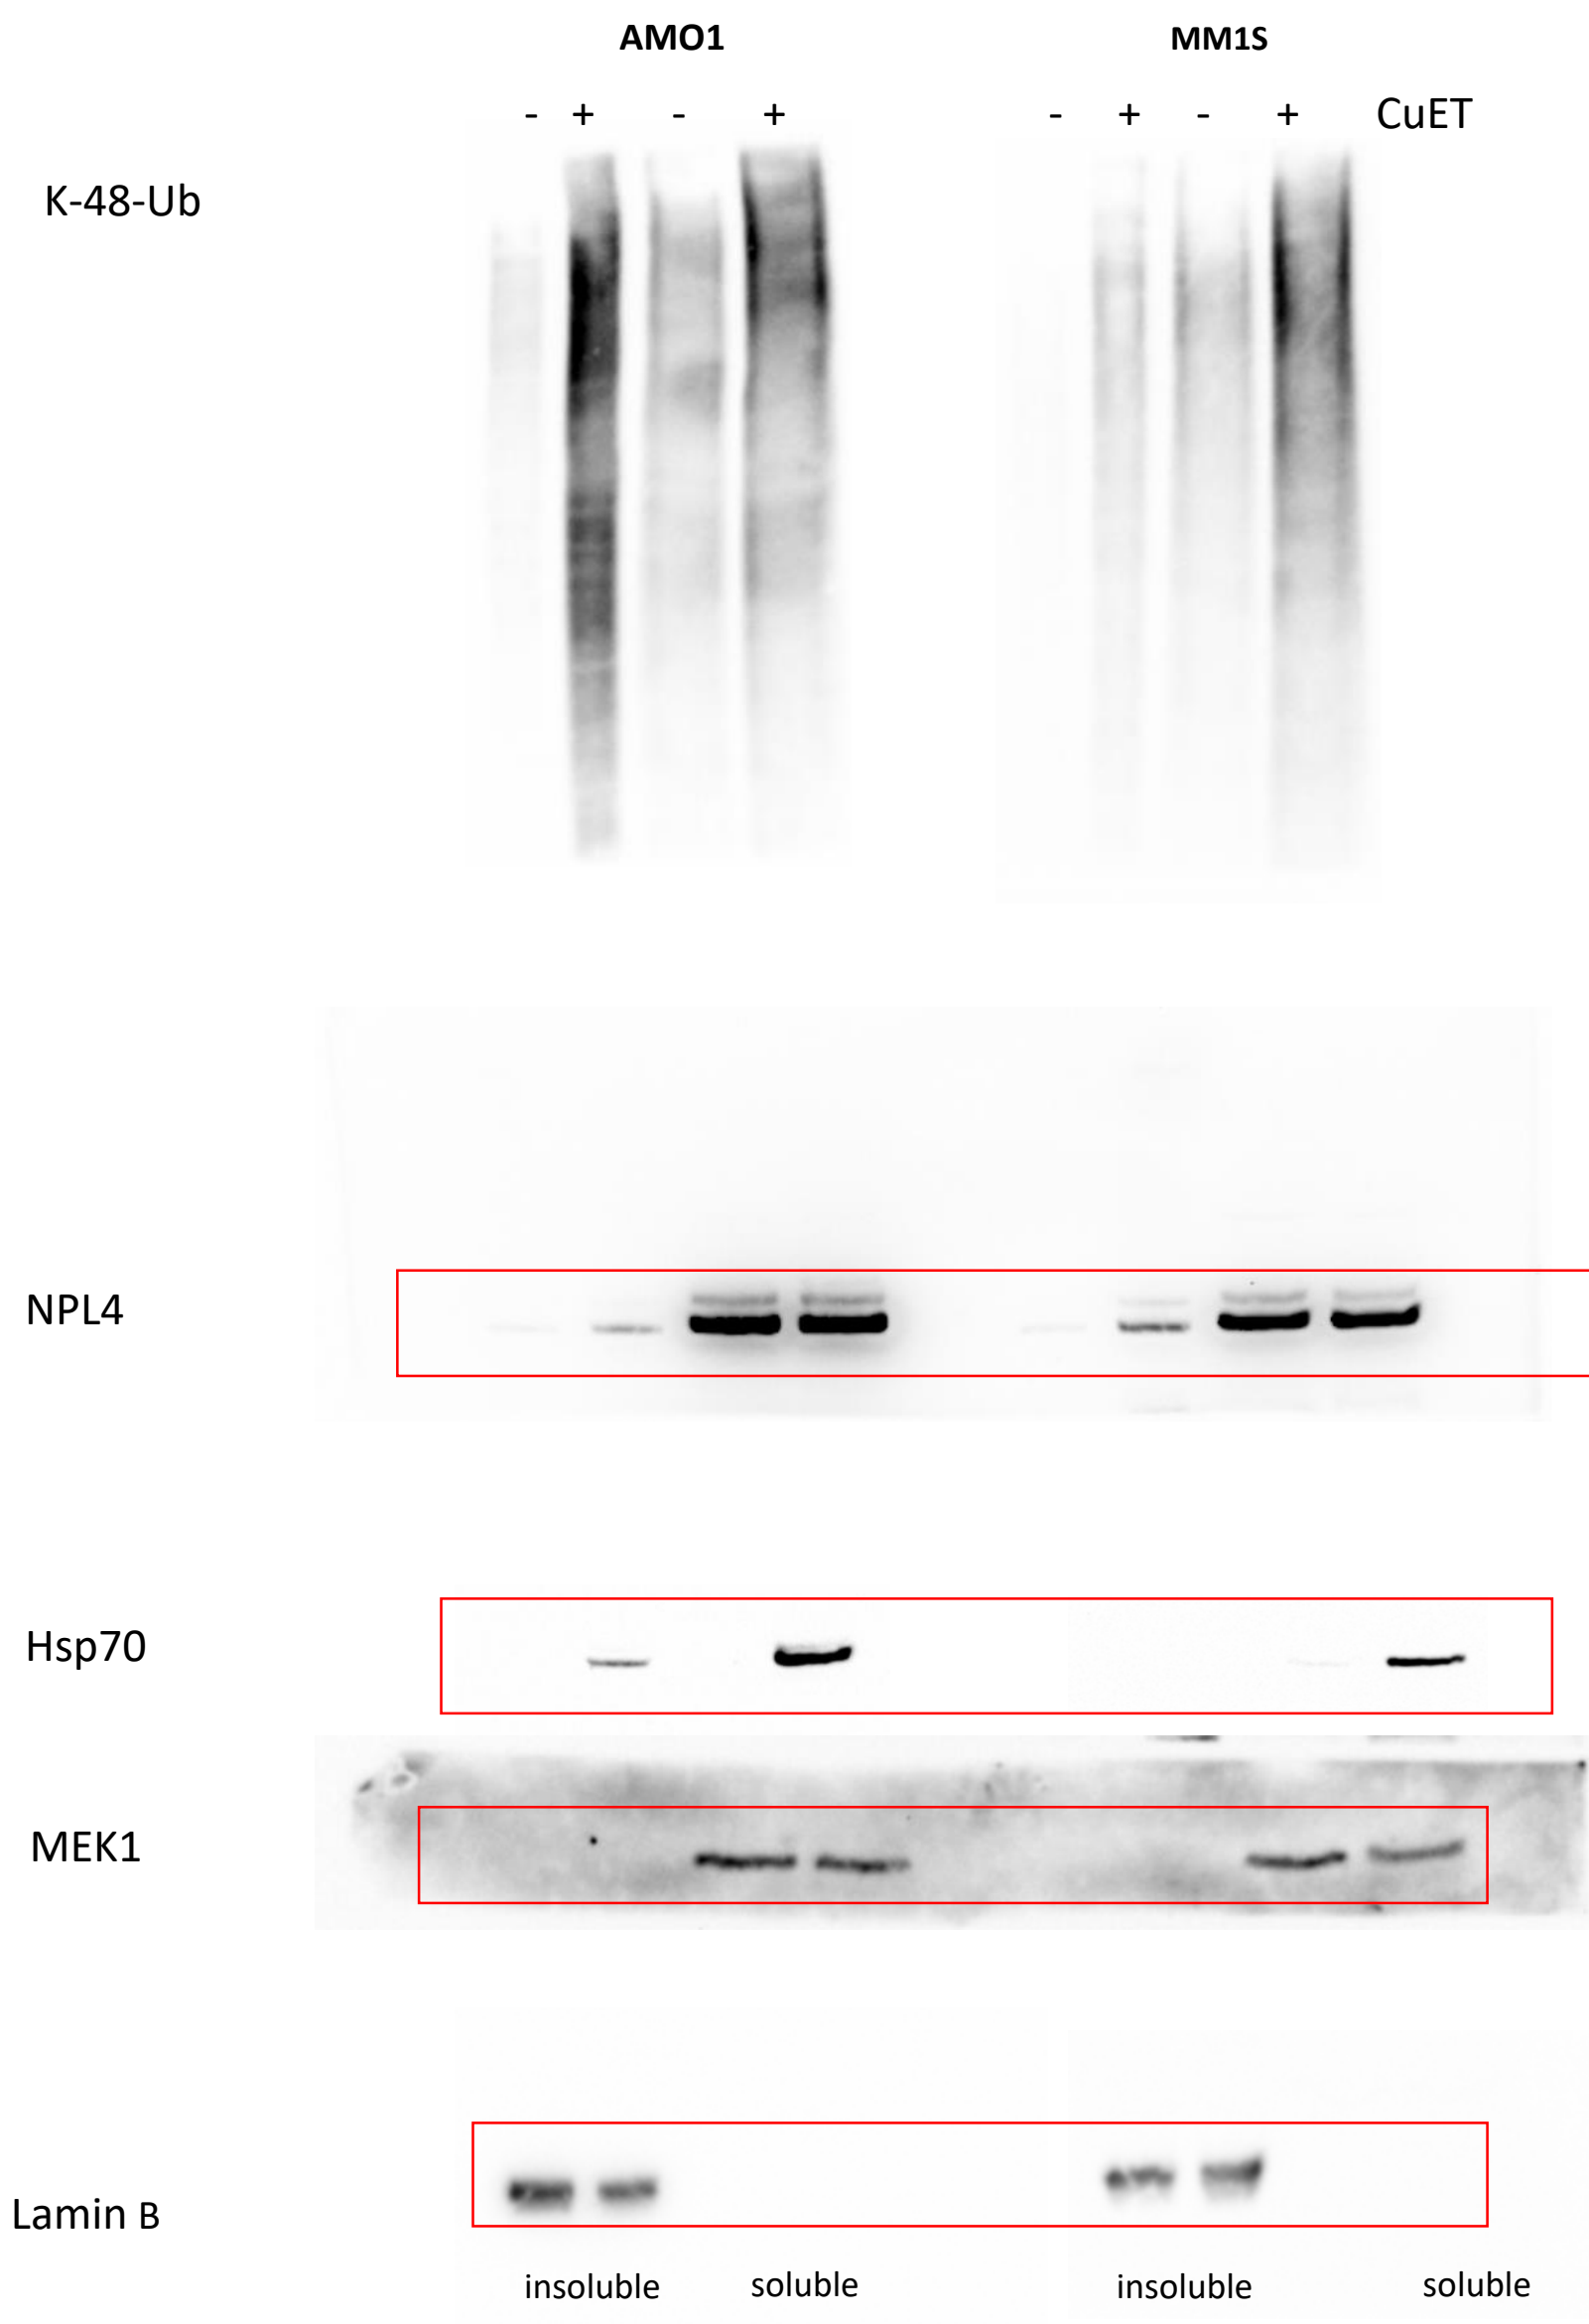

**Original data of western blot for Figure 2 B**

**AMO1**

**L363**

K-48-Ub

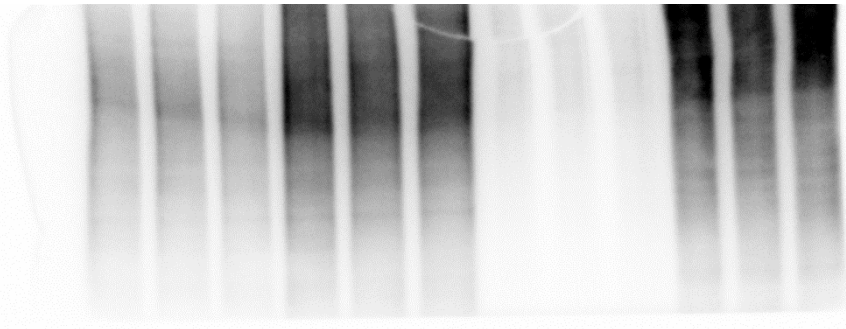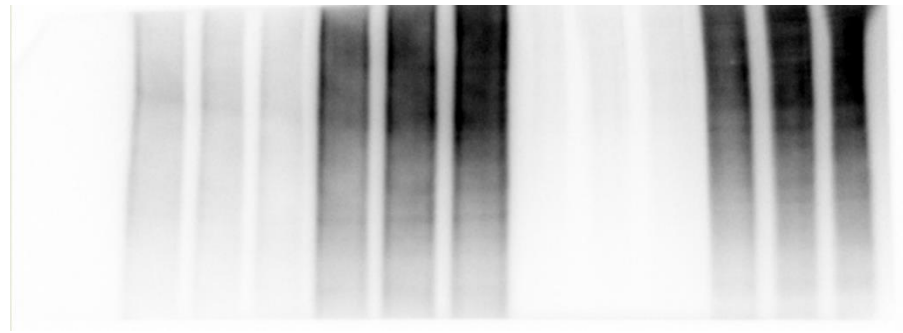

p97

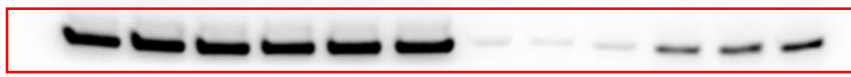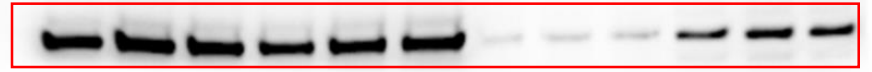

NPL4

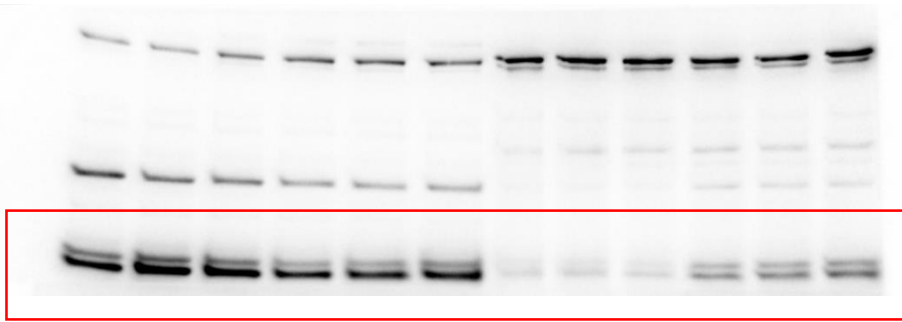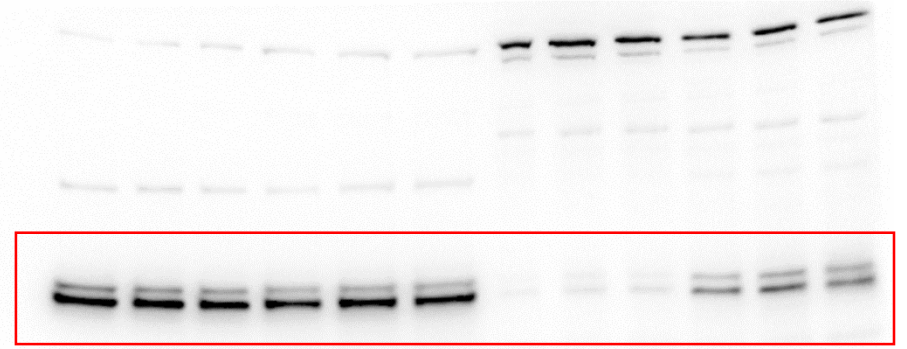

Hsp70

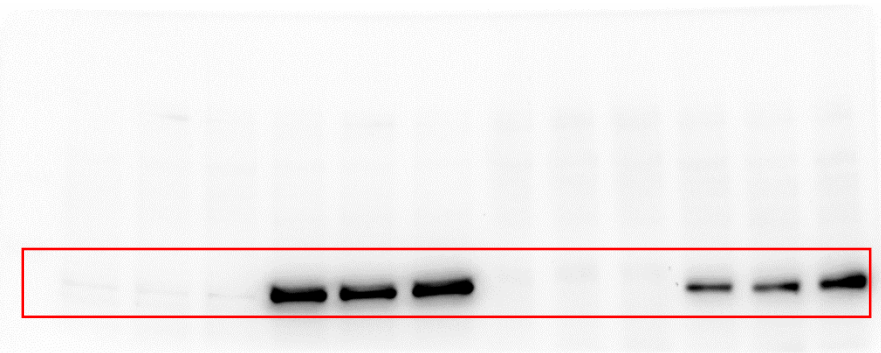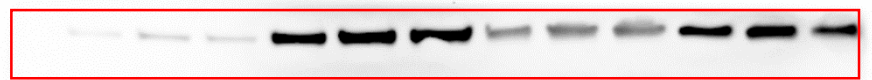

MEK1

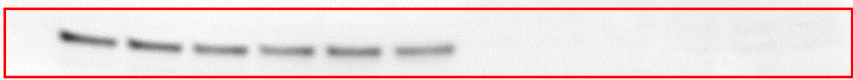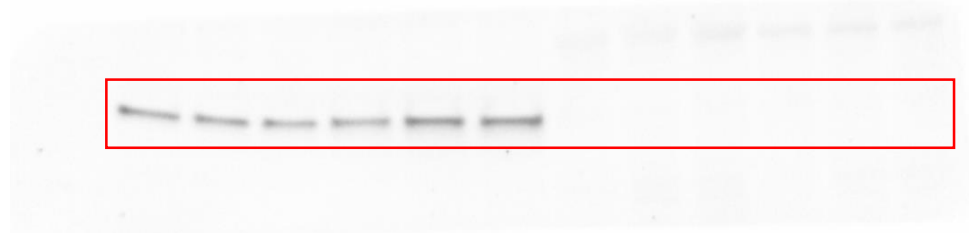

Lamin B

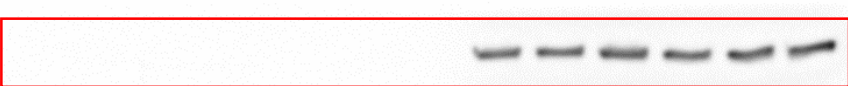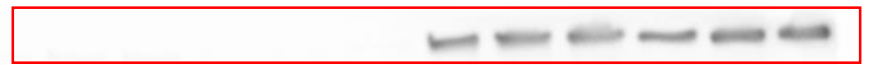

soluble

insoluble

soluble

insoluble

**Original data of western blot for Figure 4**

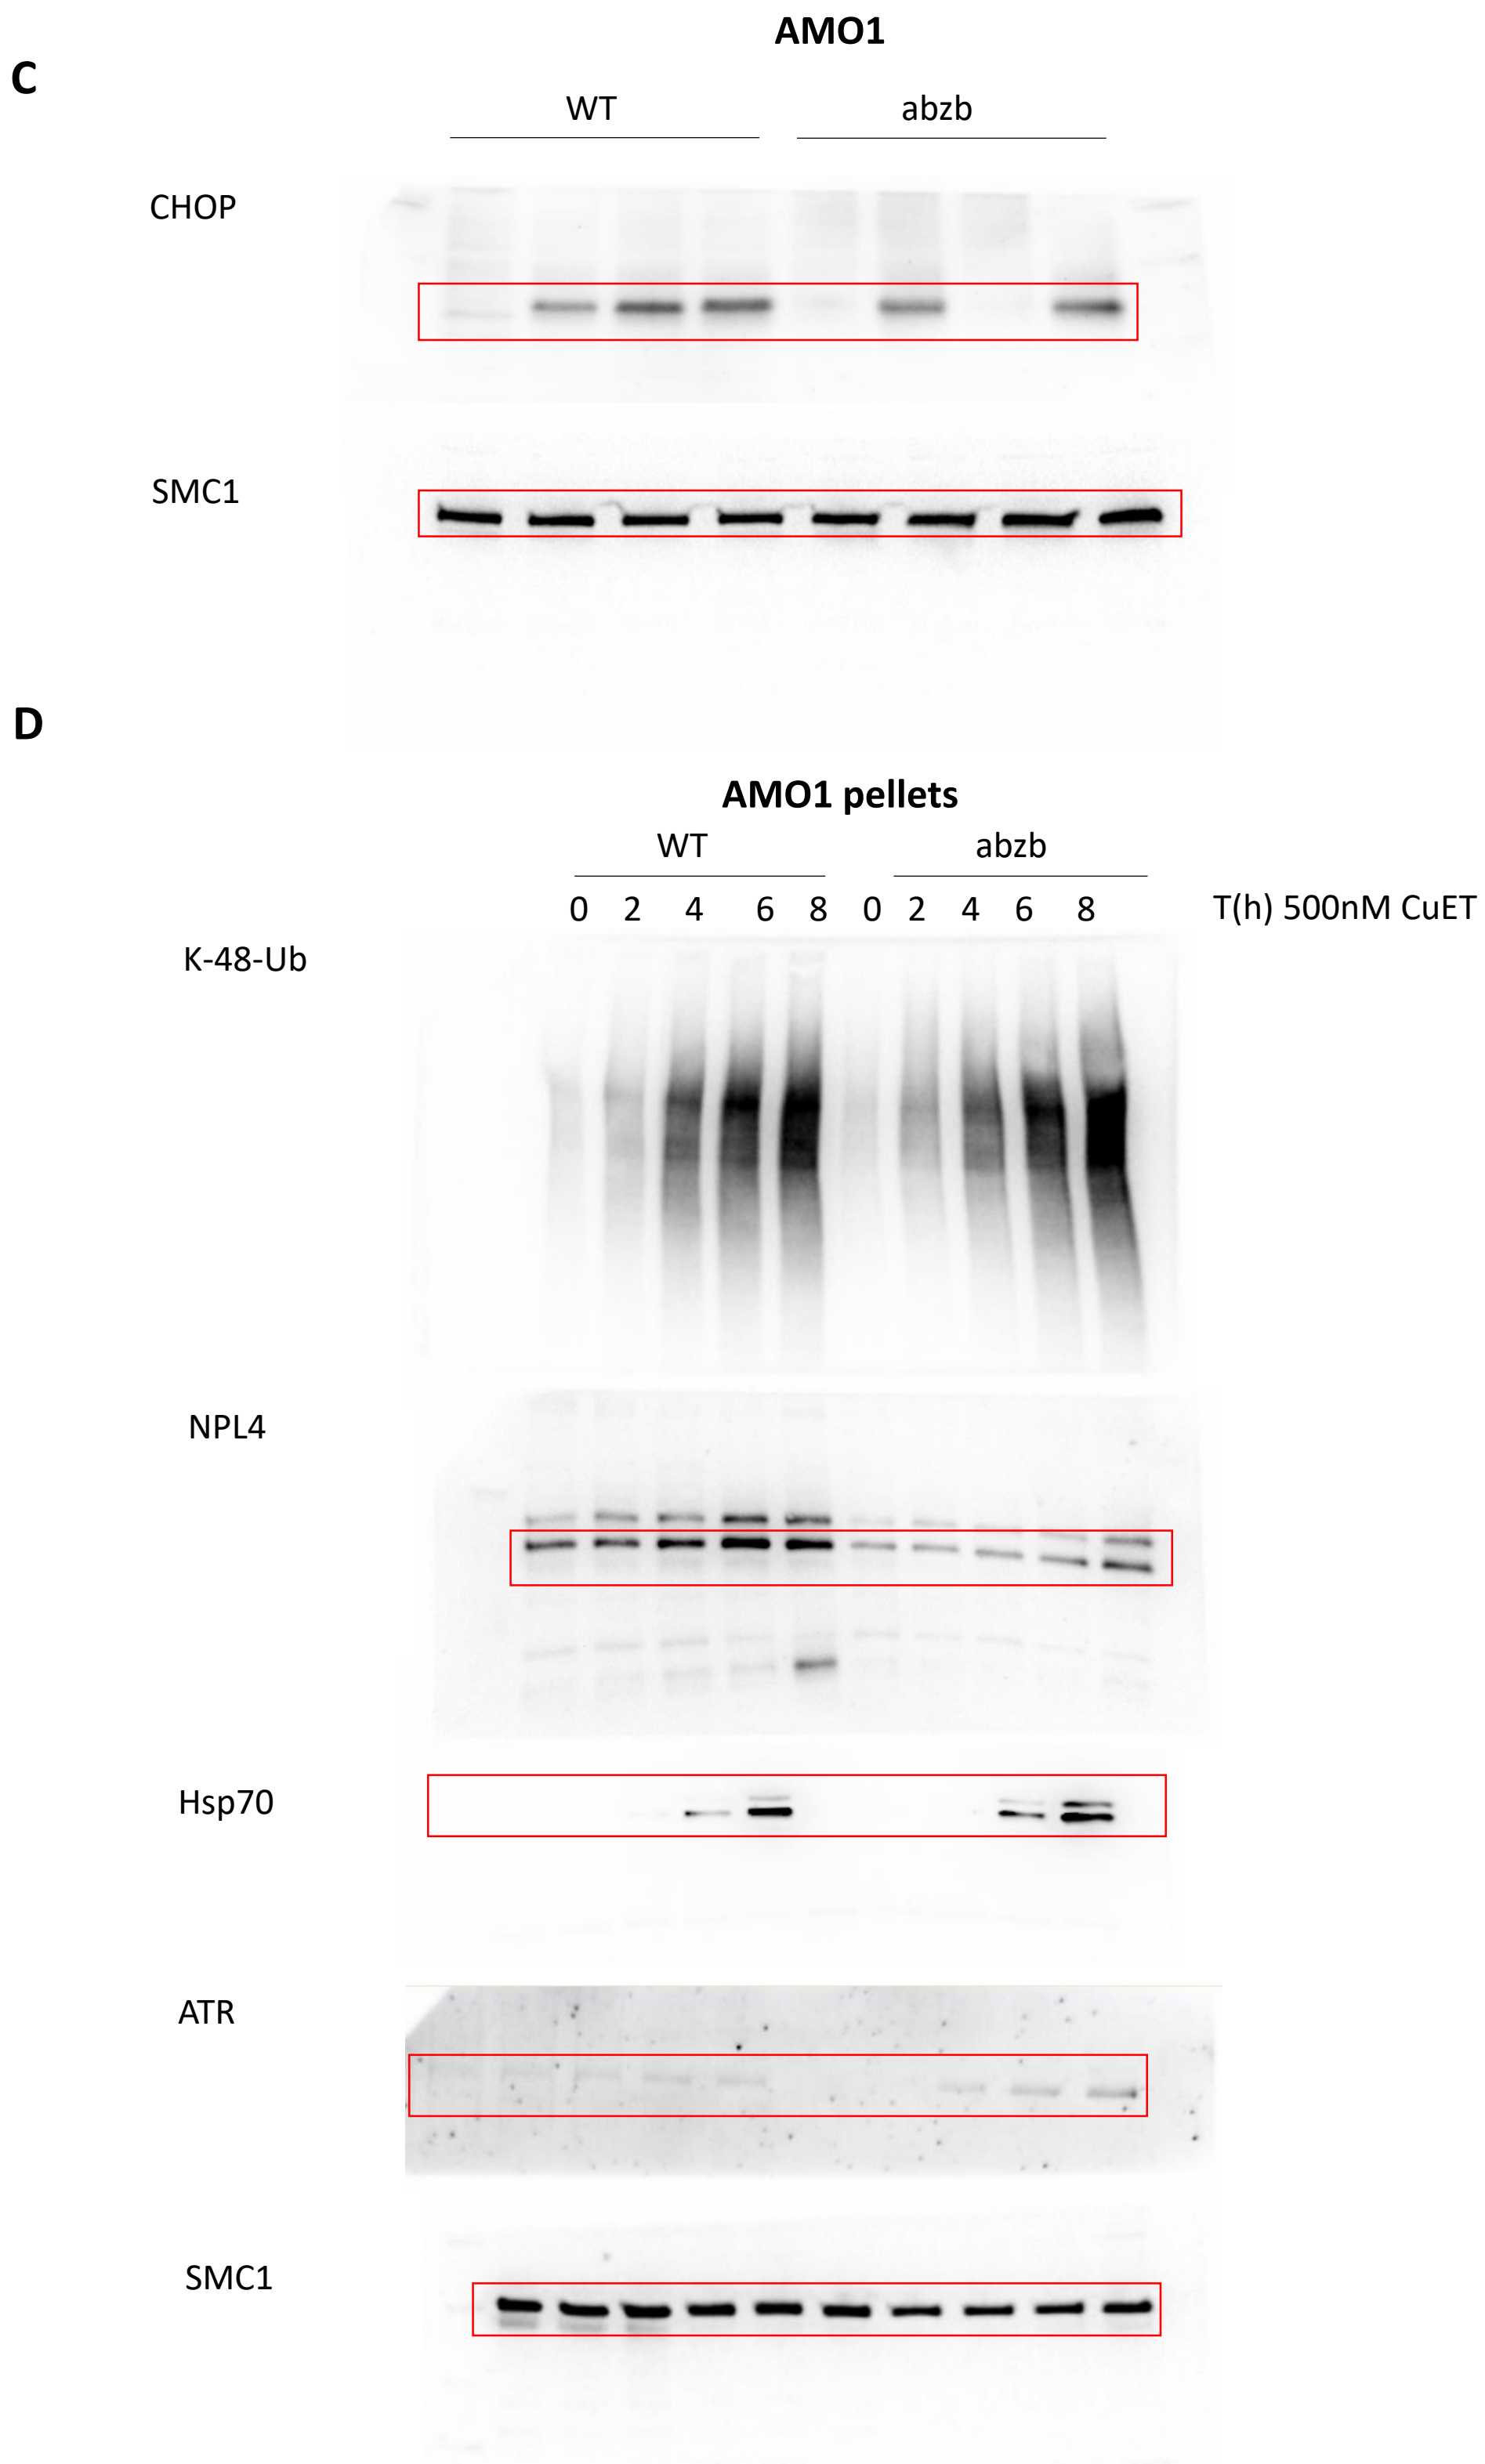

Original data of western blot for Supplementary Figure 1 C

K-48-Ub

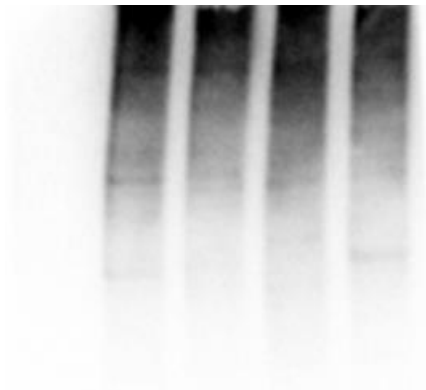

BiP

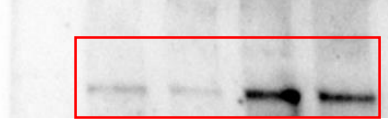

VCP/p97

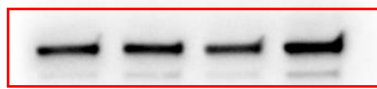

NPL4

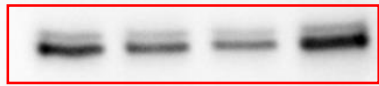

Original data of western blot for Supplementary Figure 3

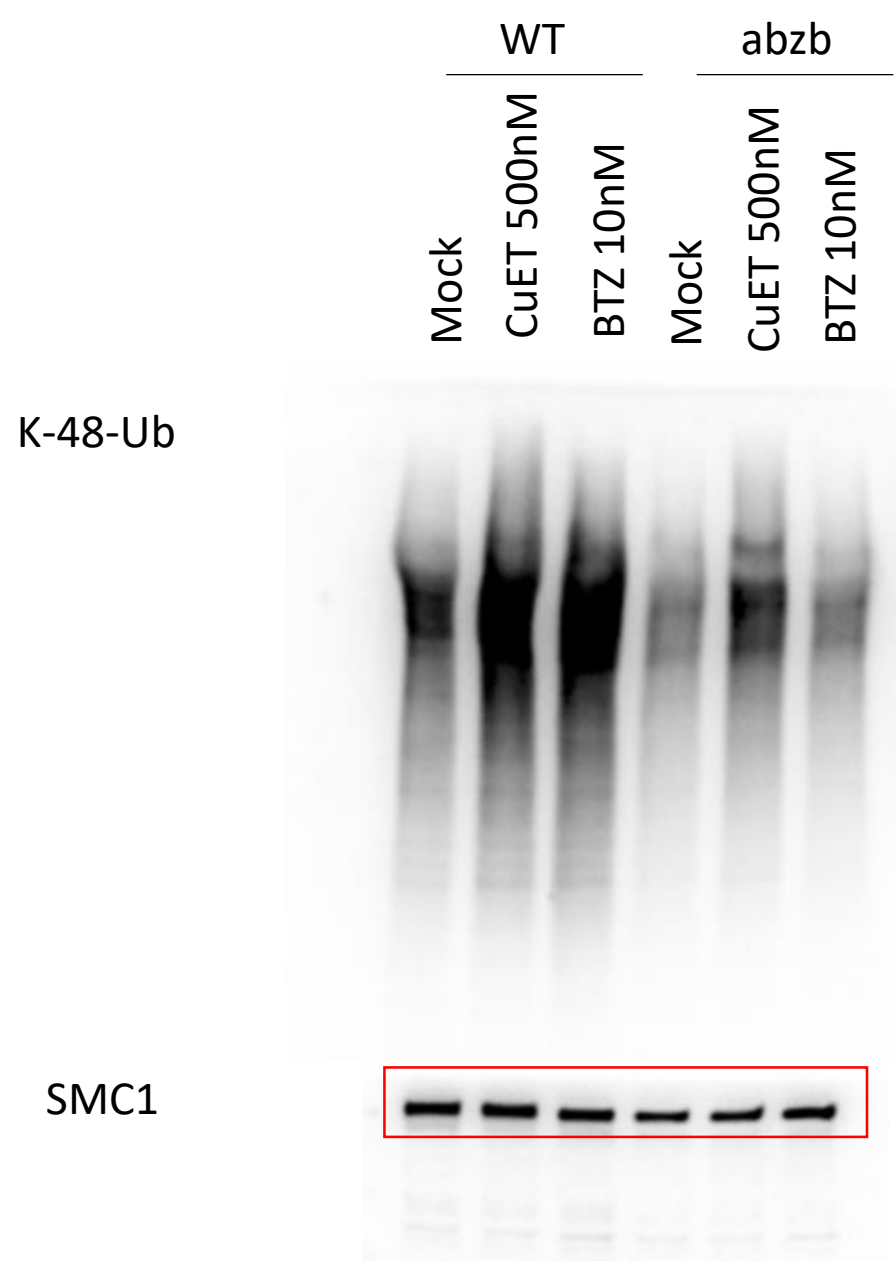

**Original data of western blot for Supplementary Figure 4**

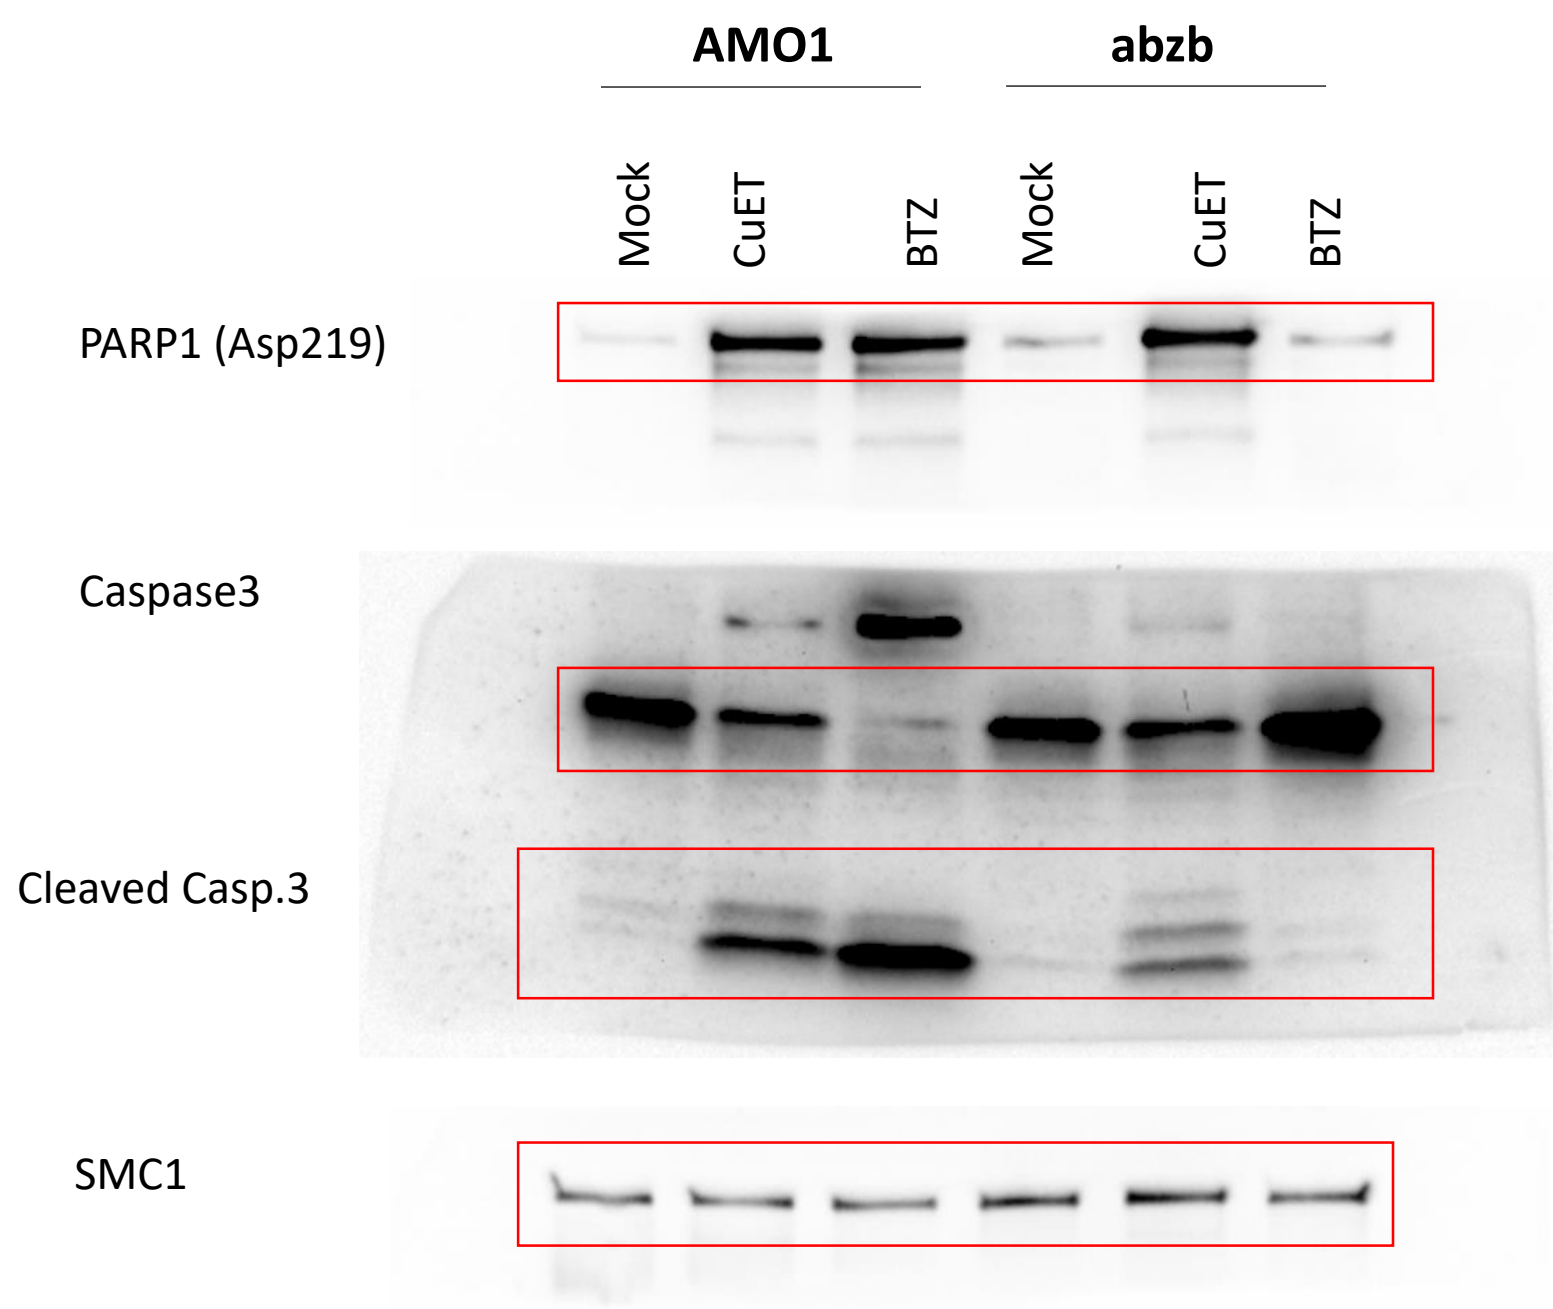



Original data of western blot for Supplementary Figure 5

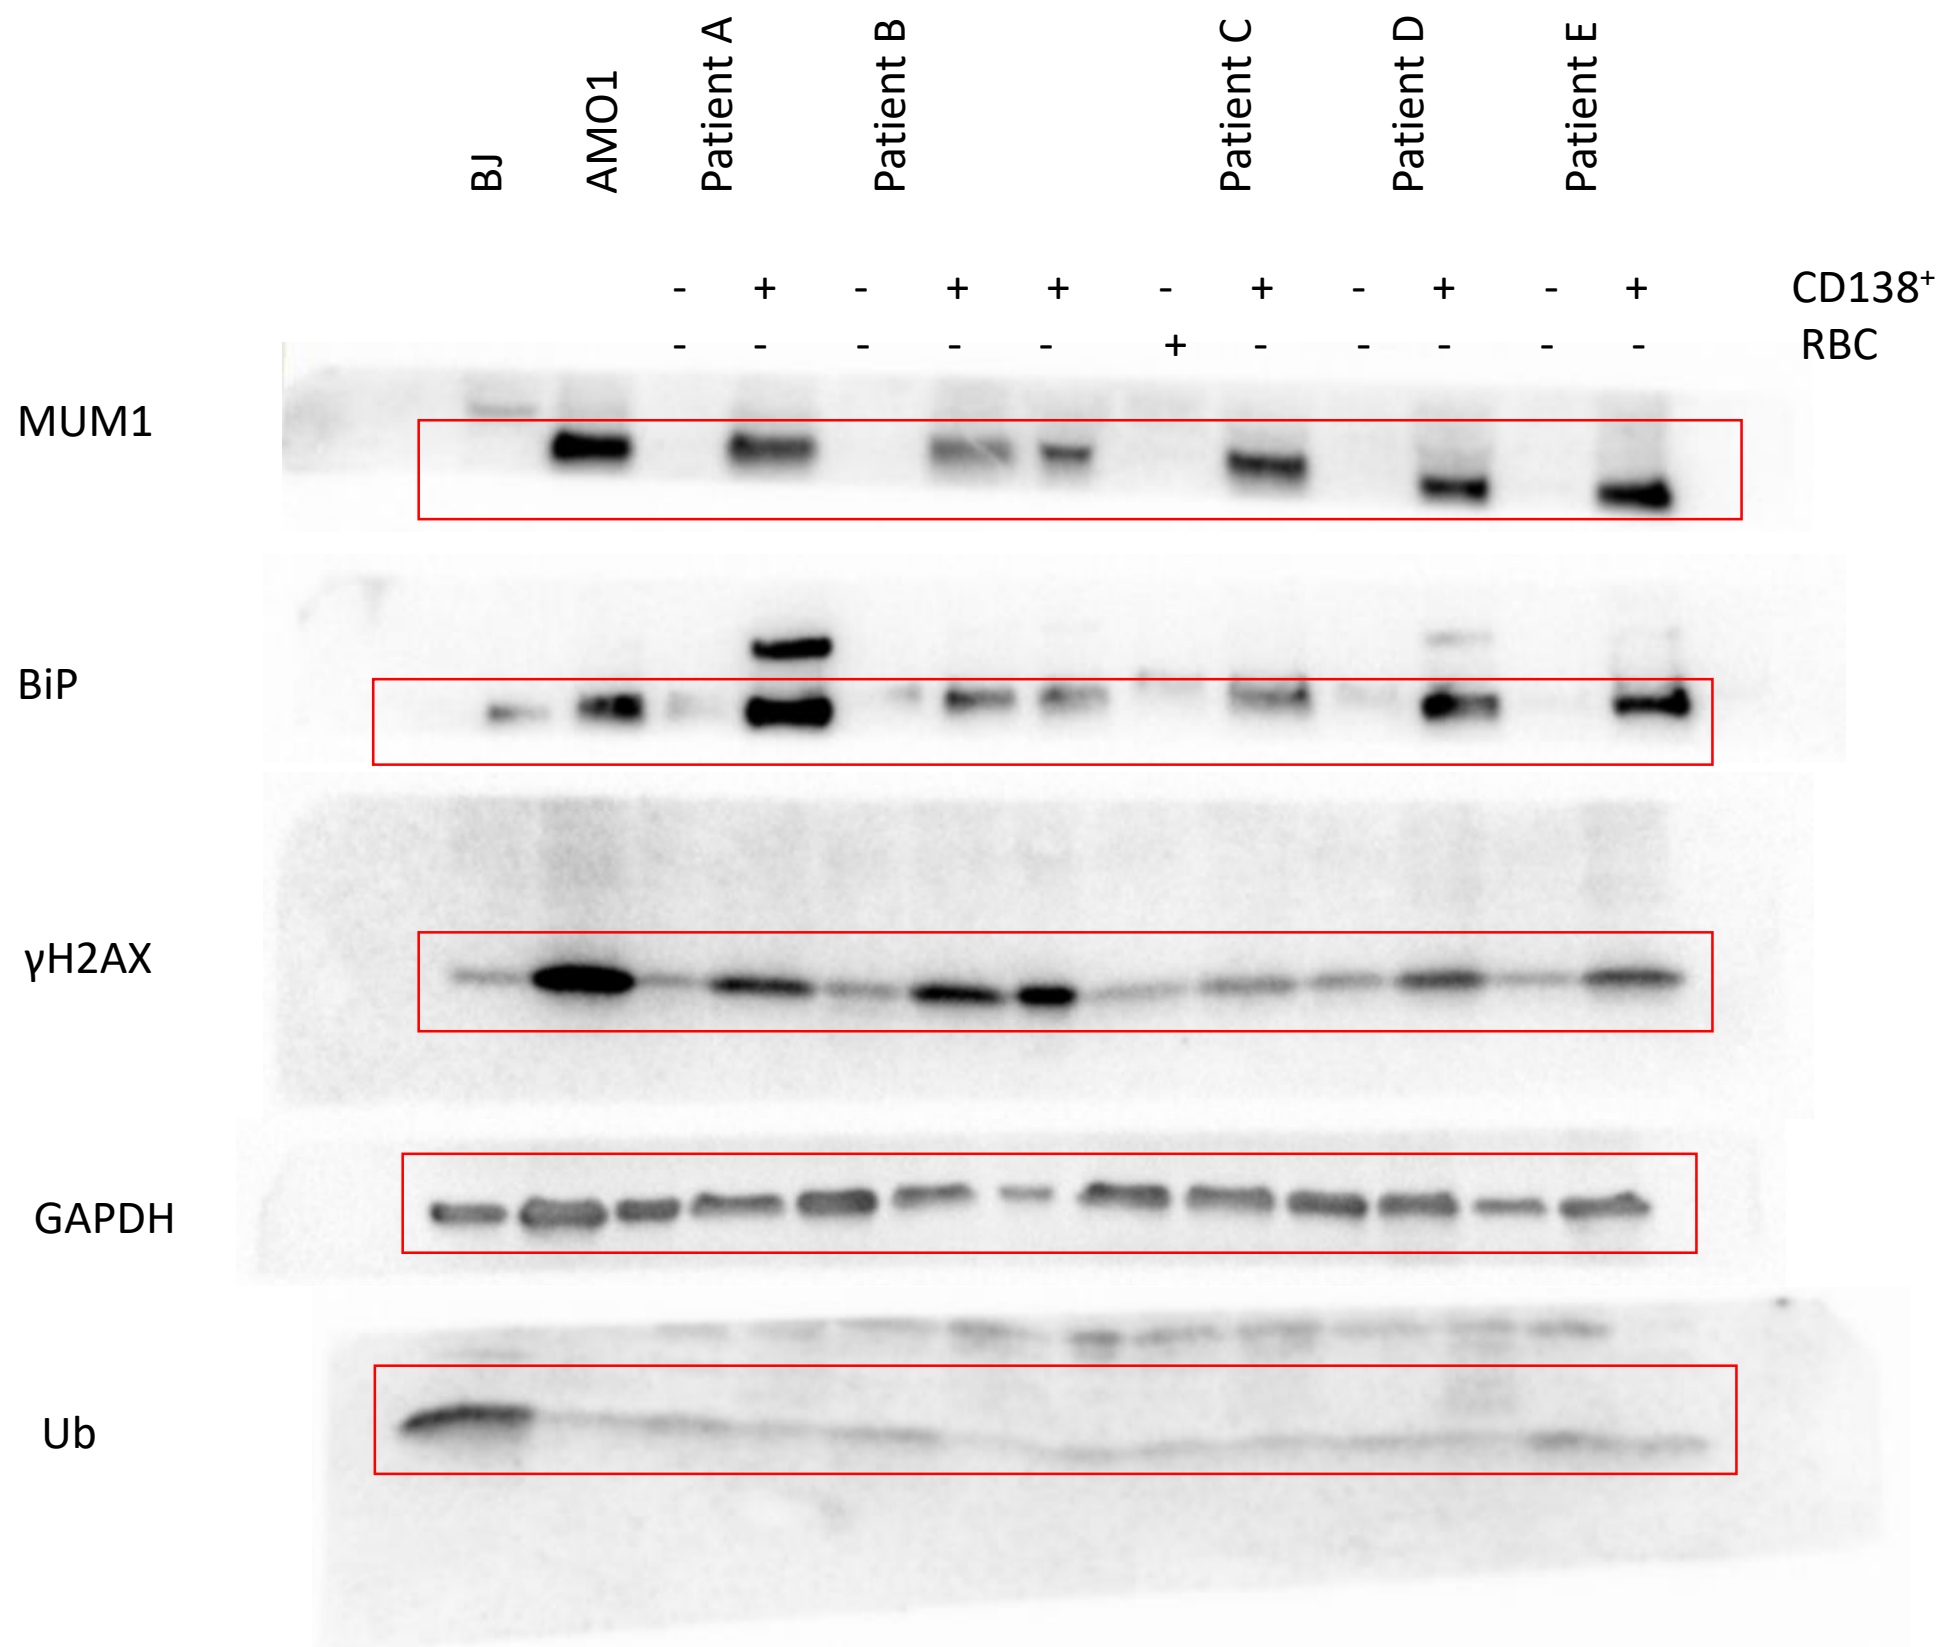



Original data of western blot for Supplementary Figure 6

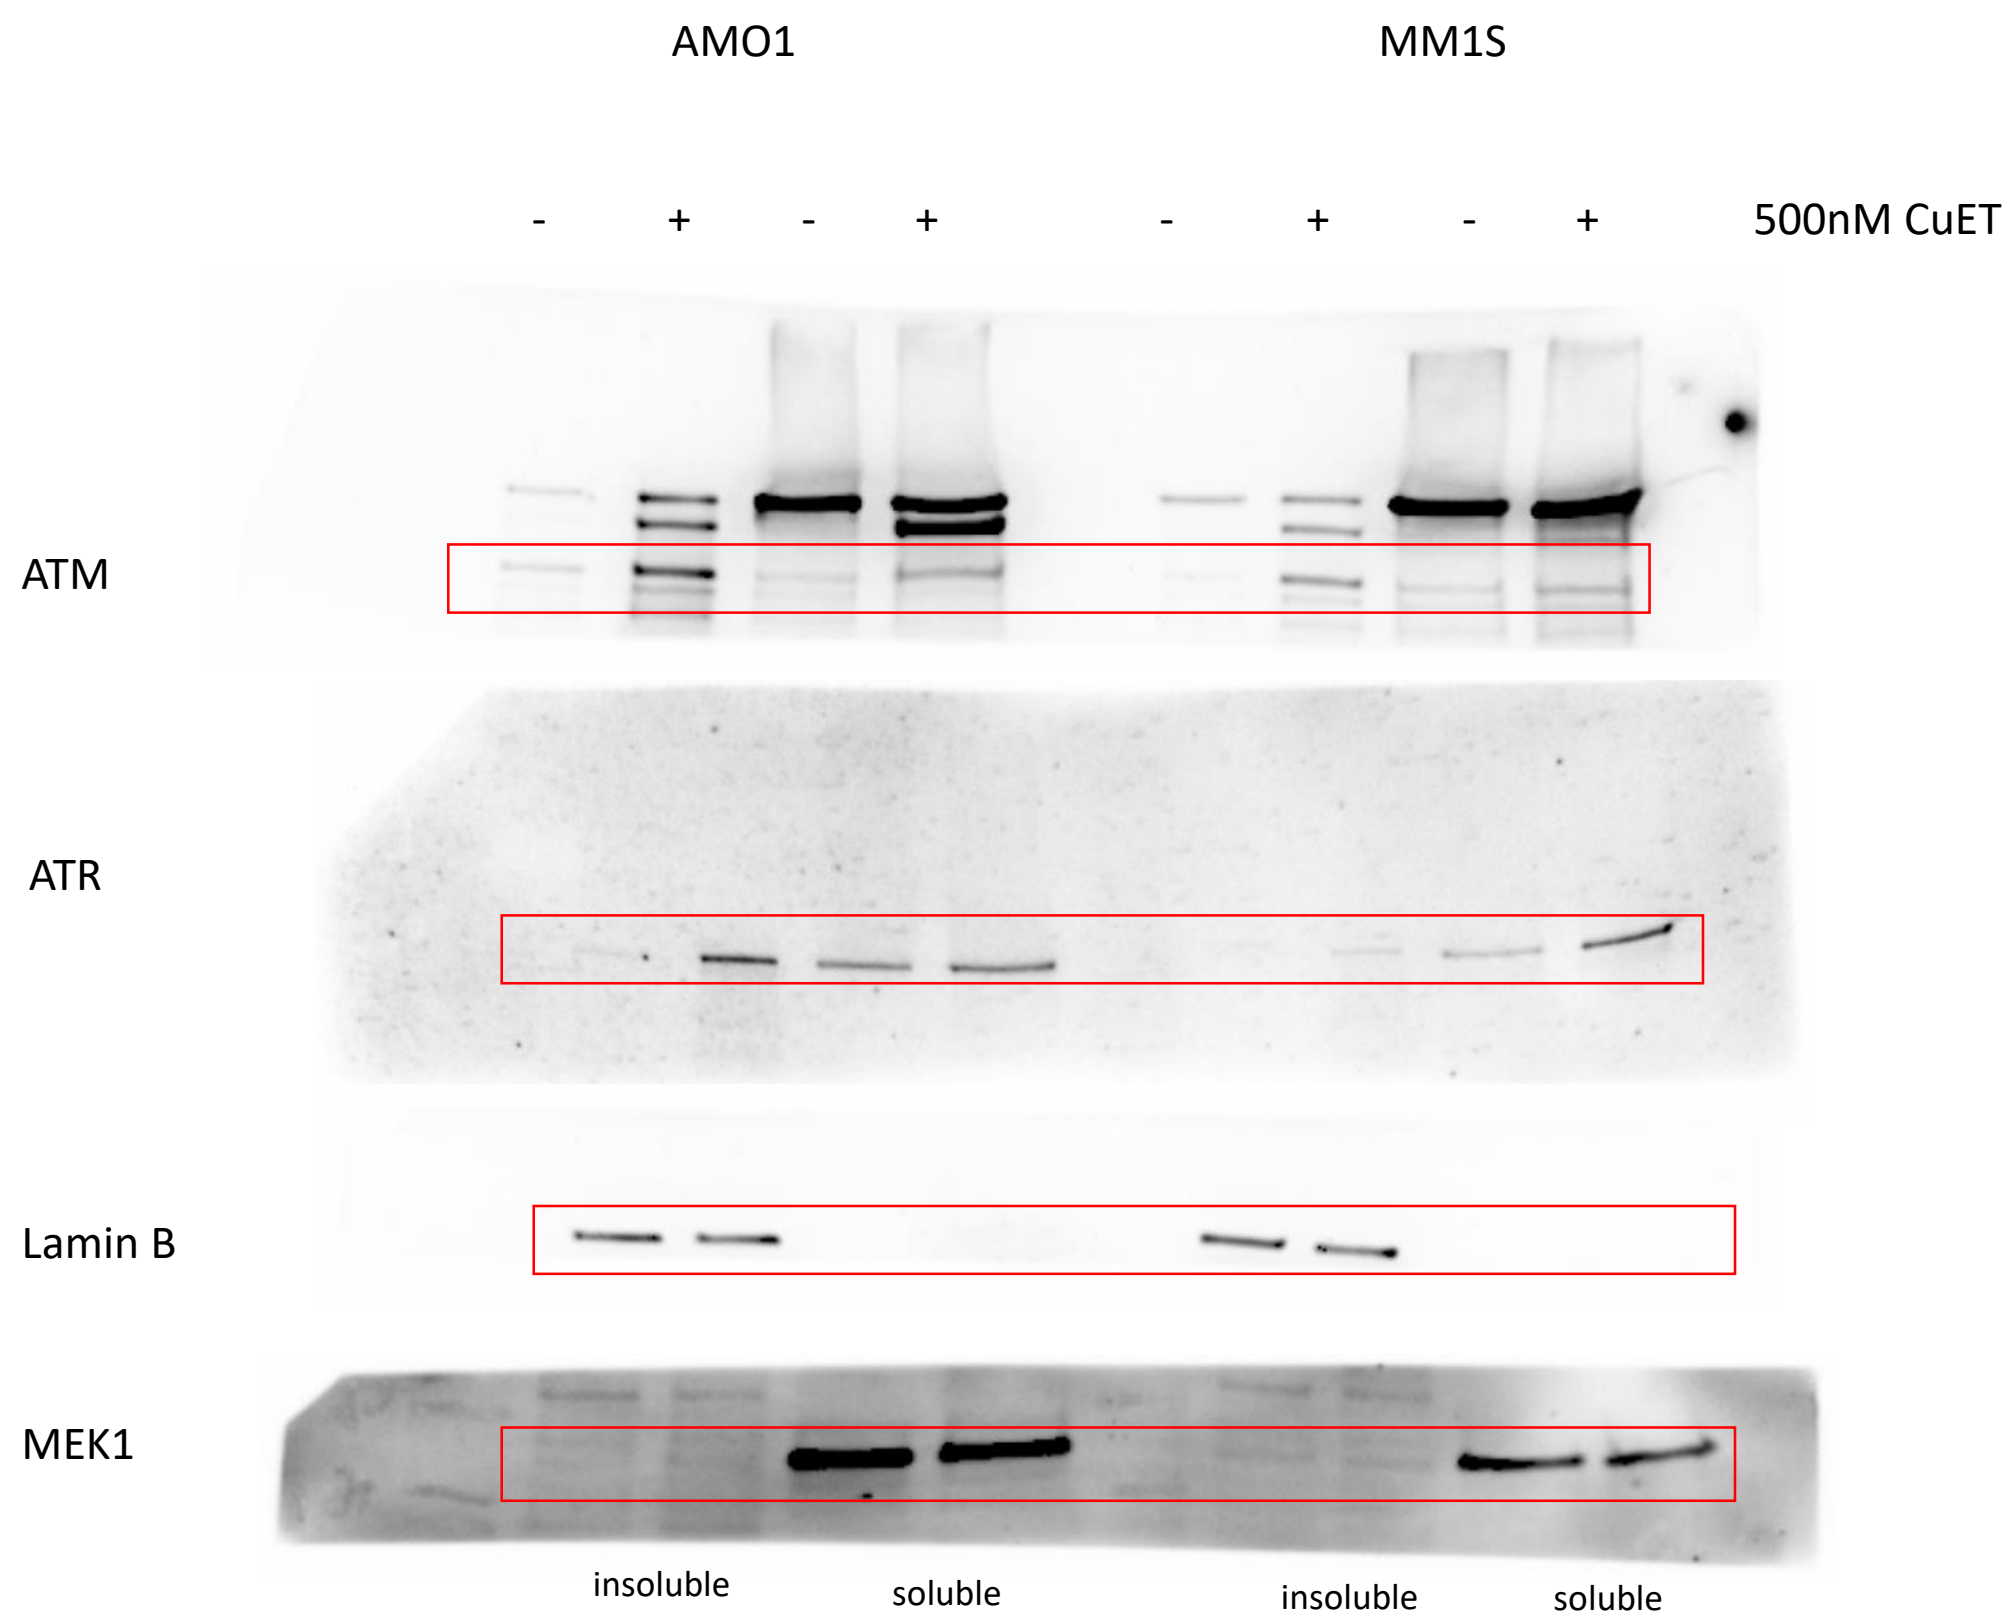

Supplement: 41419_2022_4651_MOESM2_ESM.pdf [file 41419_2022_4651_MOESM2_ESM.pdf]
